# Supplementary material for: Discriminating unalike single nucleobase mismatches using a molecularly resolved, label-free, interfacial LNA-based assay
Source: Royal Society of Chemistry journal article supplement (doi:10.1039/c6an00484a), 2016-01-01
Supplement: c6an00484a1.pdf [file c6an00484a1.pdf]

## Supplementary Material

### Discriminating Unalike Single Nucleobase Mismatches using a Molecularly Resolved, Label-free, Interfacial LNA-based Assay

Hiya Lahiri, Sourav Mishra, Tanushree Mana and Rupa Mukhopadhyay\*

Department of Biological Chemistry, Indian Association for the Cultivation of Science,  
Jadavpur, Kolkata 700 032, India

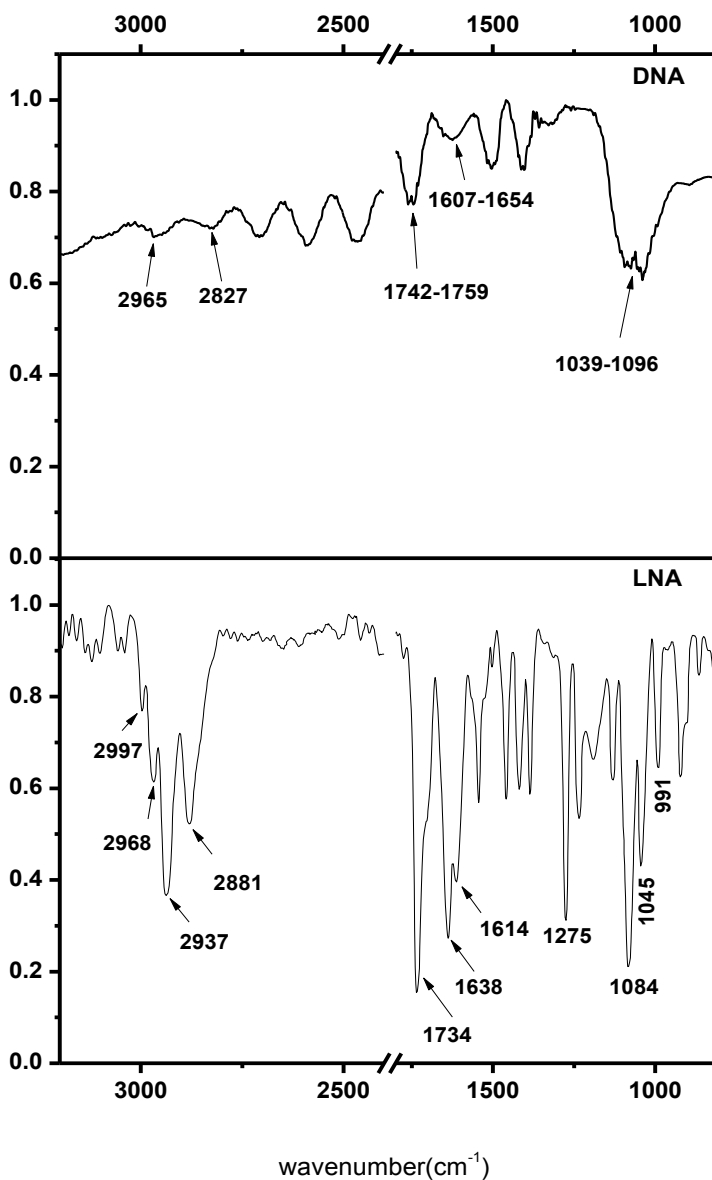

Fig. S1: RAIR spectra of DNA and LNA layers on gold(111) surface acquired for the same probe concentration 0.1  $\mu$ M and the same incubation time 4 h.

Assignment of the primary IR frequencies of that differentiate between DNA and LNA cases

| ASSIGNMENT               | DNA                                                                   | LNA                                                                                                         |
|--------------------------|-----------------------------------------------------------------------|-------------------------------------------------------------------------------------------------------------|
| 2997 <sup>1</sup>        | ----                                                                  | <b>V(C-H)aromatic, present in nucleobases</b>                                                               |
| 2965-2968 <sup>1</sup>   | Vasym(CH <sub>3</sub> ), present in thymine bases                     | Vasym(CH <sub>3</sub> ), present in thymine bases, <b>peak is more intense than in case of DNA</b>          |
| 2937 <sup>1</sup>        | ----                                                                  | <b>Vasym(CH<sub>2</sub>), present in hexyl spacer and locked sugar moieties</b>                             |
| 2881 <sup>1</sup>        | ----                                                                  | <b>Vsym(CH<sub>2</sub>)</b>                                                                                 |
| 1734-1743 <sup>2,3</sup> | v(C=O) nucleobase, present in thymine and guanine                     | v(C=O), present in thymine and guanine, <b>peak much sharper and intense</b>                                |
| 1607-1654 <sup>2,3</sup> | v(C=O) nucleobase, present in cytosine and adenine                    | v(C=O), present in cytosine and adenine, <b>peak much sharper and intense</b>                               |
| 1614 <sup>4</sup>        | ----                                                                  | <b>δ(-NH<sub>2</sub>), v(C=N), present in nucleobases</b>                                                   |
| 1544 <sup>4</sup>        | ----                                                                  | <b>v(C=C), v(C=N), present in nucleobases</b>                                                               |
| 1458 <sup>4</sup>        | ----                                                                  | <b>purine imidazolic ring vib.</b>                                                                          |
| 1416 <sup>5-7</sup>      | ----                                                                  | <b>sugar vib. (C3'- endo)</b>                                                                               |
| 1275 <sup>8</sup>        | ----                                                                  | <b>thymidine (N3-H bending vib.)</b>                                                                        |
| 1191 <sup>9</sup>        | ----                                                                  | <b>sugar phosphate backbone vib. and N-type sugar conformation</b>                                          |
| 1039-1096 <sup>10</sup>  | v(PO <sub>2</sub> ) <sup>-</sup> , sugar-phosphate backbone vibration | v(PO <sub>2</sub> ) <sup>-</sup> , sugar-phosphate backbone vibration, <b>peak much sharper and intense</b> |

## References:

1. Silverstein, R.; Webster, F. *Spectroscopic Identification of Organic Compounds*, 6th ed.; John Wiley & Sons Inc: New York, 2006; Chapter 3.
2. Wang, Z.; Liu, D.; Dong, S. In-situ FTIR study on adsorption and oxidation of native and thermally denatured calf thymus DNA at glassy carbon electrodes. *Biophys. Chem.* 2001, 89, 87.
3. Yamada, T.; Shirasaka, K.; Takano, A.; Kawai, M. Adsorption of cytosine, thymine, guanine and adenine on Cu(1 1 0) studied by infrared reflection absorption spectroscopy. *Surf. Sci.* 2004, 561, 233.
4. Mateo-Martí, E.; Briones, C.; Pradier, C. M.; Martín-Gago, J. A. A DNA biosensor based on peptide nucleic acids on gold surfaces. *Biosens. Bioelectron.* 2007, 22, 1926.
5. Taillandier, E.; Liquier, J. Infrared spectroscopy of DNA. *Methods Enzymol.* 1992, 211, 307.
6. Liquier, J.; Taillandier, E. In *Infrared Spectroscopy of Biomolecules*; Mantsch, H. H., Chapman, D., Eds.; Wiley-Liss, Inc: New York, 1996; p 131.
7. Taillandier, E.; Peticolas, W. L.; Adam, S.; Huynh-Dinh, T.; Igolen, J. Polymorphism of the d(CCCGCGGG)<sub>2</sub> double helix studied by FT-i.r. spectroscopy. *Spectrochim. Acta* 1990, 46A, 107.
8. Liquier, J.; Akhebat, A.; Taillandier, E.; Ceolin, F.; Huynh Dinh, T.; Igolen, J. Characterization by FTIR spectroscopy of the oligoribonucleotide duplexes r(A-U)<sub>6</sub> and r(A-U)<sub>8</sub>. *Spectrochim. Acta* 1991, 47A, 177.
9. Pohle, W.; Fritzsche, H. A new conformation-specific infrared band of A-DNA in films. *Nucleic Acids Res.* 1980, 8, 2527.
10. Shimanouchi, T.; Tsuboi, M.; Kyogoku, Y. In *The Structure and Properties of Biomolecules and Biological Systems, Advances in Chemical Physics*; Duchesne, J., Eds.; Interscience: London, 1964; p 435.

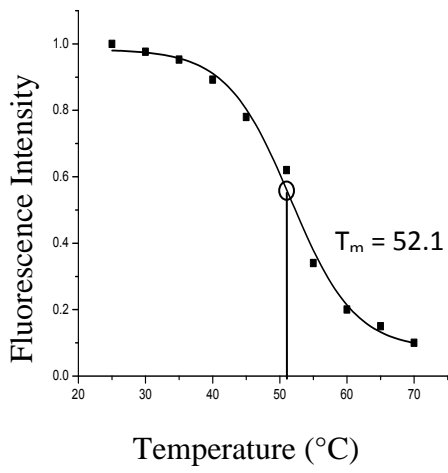

(A)

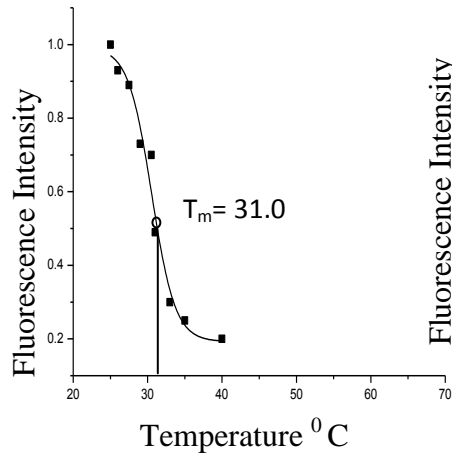

(B)

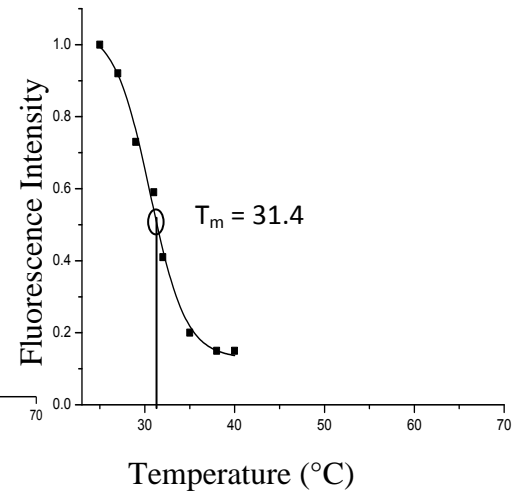

(C)

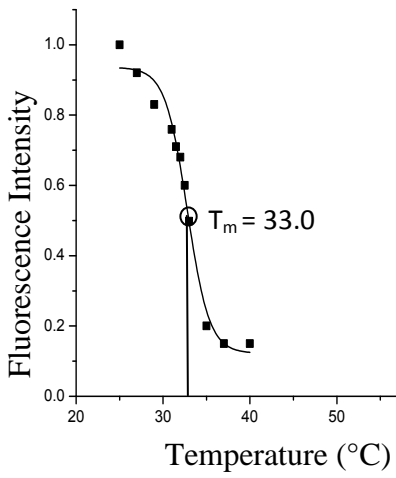

(D)

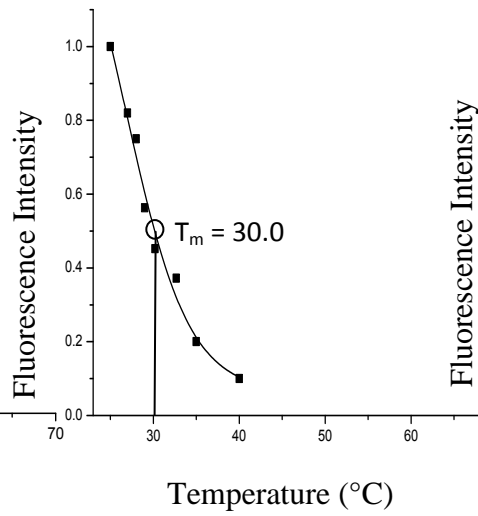

(E)

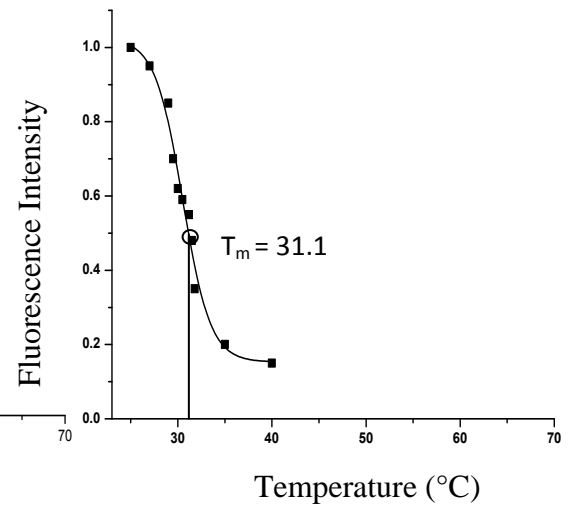

(F)

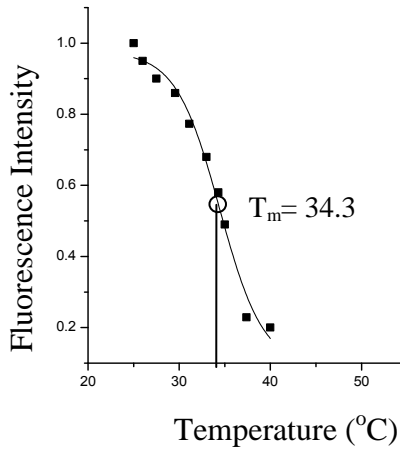

(G)

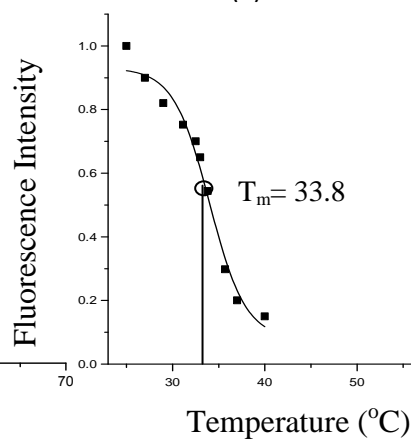

(H)

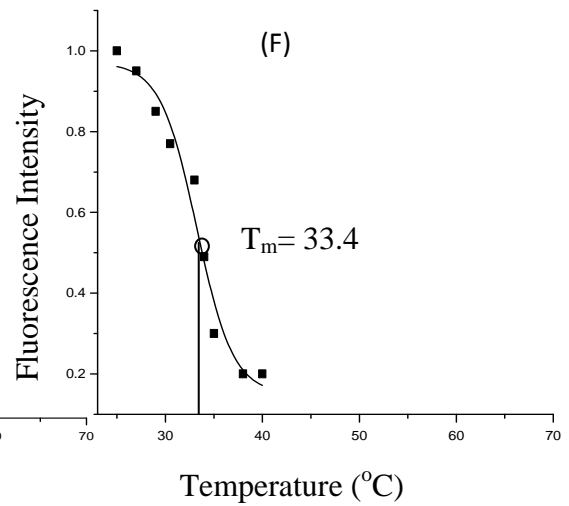

(I)

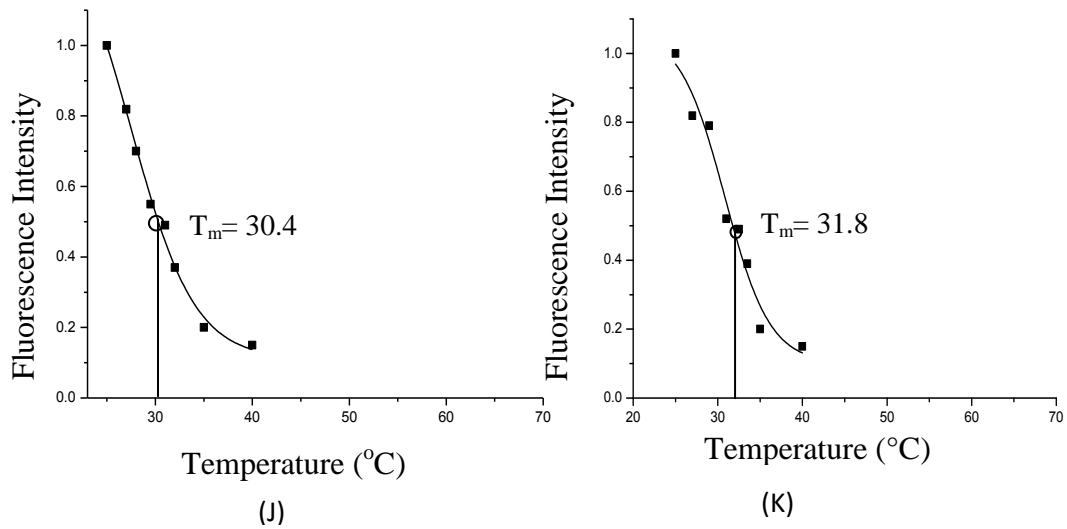

Fig. S2: Representative plots for on-surface melting temperature of LNA-DNA duplex (A) for fully matched LNA-DNA duplex,  $T_m = 52.1$  °C; and [B-G] for single mismatch at the central position (B) G: G,  $T_m = 31$  °C; (C) G: T,  $T_m = 31.4$  °C; (D) T: G,  $T_m = 33$  °C; (E) A: G,  $T_m = 30$  °C; (F) A: C,  $T_m = 31.1$  °C; (G) C: A,  $T_m = 34.3$  °C; (H) C: T,  $T_m = 33.8$  °C; (I) C: C,  $T_m = 33.4$  °C; (J) A: A,  $T_m = 30.4$  °C; (K) T: T,  $T_m = 31.8$  °C.

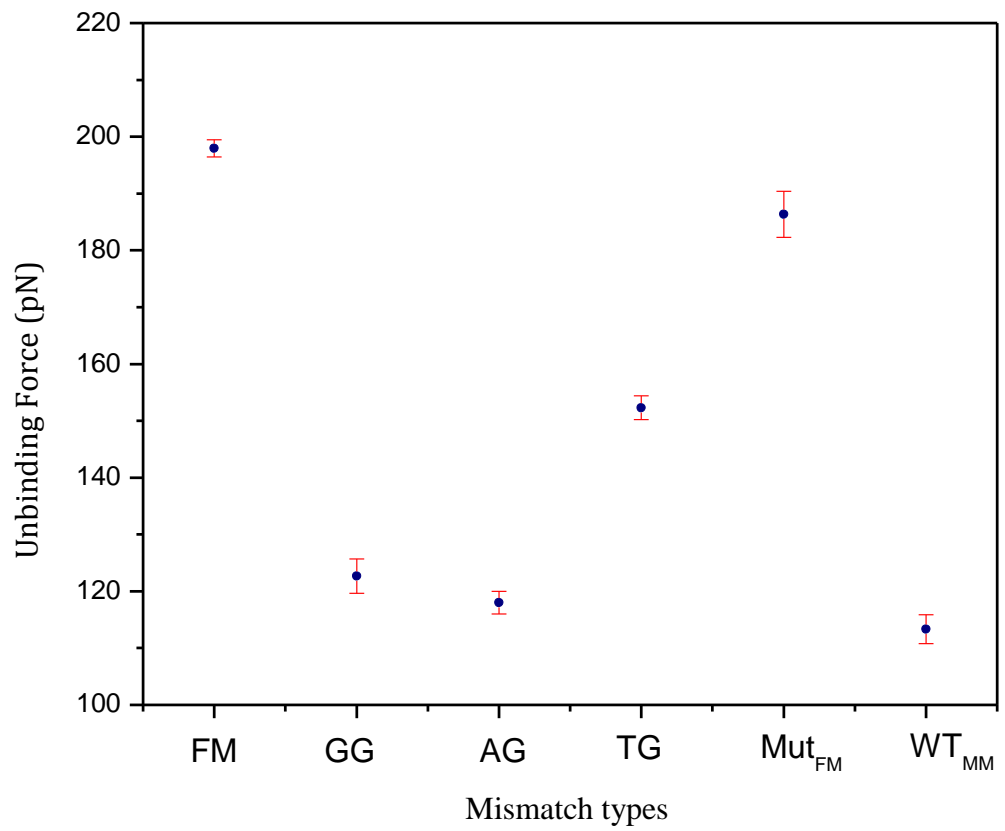

Fig. S3: Unbinding force values for fully matched as well as the mismatched combinations presented including the standard errors from mean.
